# Supplementary material
Source: MDPI journal article supplement (https://www.mdpi.com/2073-4441/16/8/1193)
Supplement: s1 [file s1]

## Supplementary Materials

**Table S1.** Characteristics of wastewater treatment plants (WWTP).

| WWTP | Connected<br>inhabitants | Average flow<br>(m <sup>3</sup> /d) | Combined /<br>separate sewer (%) |
|------|--------------------------|-------------------------------------|----------------------------------|
| 1    | 702.000                  | 153.000                             | 75 / 25                          |
| 2    | 251.000                  | 71.400                              | 62 / 38                          |
| 3    | 69.000                   | 16.500                              | 97 / 3                           |
| 4    | 2.700                    | 490                                 | 95 / 5                           |
| 5    | 2.400                    | 430                                 | 30 / 70                          |

**Table S2.** Details of SARS-CoV-2 inactivation experiments performed in the study.

| Experiment | WWTP | SARS-CoV-2<br>variant | Initial<br>concentration of<br>gene copies/ml<br>( <i>E</i> gene) | First-order<br>decay<br>constant<br>(days) | R <sup>2</sup> | T <sub>90</sub><br>(days) |
|------------|------|-----------------------|-------------------------------------------------------------------|--------------------------------------------|----------------|---------------------------|
| 1          | 1    | Delta                 | 8.8 x 10 <sup>6</sup>                                             | 0.0757                                     | 0.9692         | 30.4                      |
|            |      | Omicron               | 5.2 x 10 <sup>6</sup>                                             | 0.0655                                     | 0.9484         | 35.2                      |
|            | 2    | Delta                 | 5.2 x 10 <sup>6</sup>                                             | 0.0903                                     | 0.9343         | 25.5                      |
|            |      | Omicron               | 7.2 x 10 <sup>6</sup>                                             | 0.0916                                     | 0.9756         | 25.1                      |
|            | 3    | Delta                 | 4.1 x 10 <sup>6</sup>                                             | 0.1088                                     | 0.9485         | 21.2                      |
|            |      | Omicron               | 5.9 x 10 <sup>6</sup>                                             | 0.1194                                     | 0.9644         | 19.3                      |
|            | 4    | Delta                 | 4.4 x 10 <sup>6</sup>                                             | 0.1015                                     | 0.8760         | 22.7                      |
|            |      | Omicron               | 6.8 x 10 <sup>6</sup>                                             | 0.1102                                     | 0.9277         | 20.9                      |
| 2          | 1    | Delta                 | 3.2 x 10 <sup>6</sup>                                             | 0.1483                                     | 0.9572         | 15.5                      |
|            |      | Omicron               | 9.2 x 10 <sup>5</sup>                                             | 0.1096                                     | 0.8958         | 21.0                      |

|   |   |         |                   |        |        |      |
|---|---|---------|-------------------|--------|--------|------|
|   | 2 | Delta   | $2.5 \times 10^6$ | 0.1189 | 0.8827 | 19.4 |
|   |   | Omicron | $9.6 \times 10^5$ | 0.0927 | 0.9431 | 24.8 |
|   | 3 | Delta   | $2.1 \times 10^6$ | 0.1057 | 0.9843 | 21.8 |
|   |   | Omicron | $1.1 \times 10^6$ | 0.1038 | 0.9815 | 22.2 |
|   | 4 | Delta   | $2.6 \times 10^6$ | 0.1139 | 0.9547 | 20.2 |
|   |   | Omicron | $8.3 \times 10^5$ | 0.0932 | 0.9129 | 24.7 |
|   | 5 | Delta   | $2.4 \times 10^6$ | 0.0808 | 0.9234 | 28.5 |
|   |   | Omicron | $1.1 \times 10^6$ | 0.0793 | 0.9275 | 29.0 |
| 3 | 1 | Delta   | $6.5 \times 10^5$ | 0.0999 | 0.9274 | 23.0 |
|   |   | Omicron | $5.4 \times 10^5$ | 0.0965 | 0.9676 | 23.9 |
|   | 2 | Delta   | $6.9 \times 10^5$ | 0.1109 | 0.8831 | 20.8 |
|   |   | Omicron | $5.6 \times 10^5$ | 0.1109 | 0.9396 | 20.8 |
|   | 3 | Delta   | $4.6 \times 10^5$ | 0.0244 | 0.7122 | 94.4 |
|   |   | Omicron | $3.8 \times 10^5$ | 0.0380 | 0.7347 | 60.6 |
|   | 4 | Delta   | $7.4 \times 10^5$ | 0.0492 | 0.9627 | 46.8 |
|   |   | Omicron | $5.1 \times 10^5$ | 0.0474 | 0.9609 | 48.6 |
|   | 5 | Delta   | $5.6 \times 10^5$ | 0.0671 | 0.9809 | 34.3 |
|   |   | Omicron | $6.2 \times 10^5$ | 0.0675 | 0.9961 | 34.1 |
| 4 | 1 | Delta   | $1.0 \times 10^6$ | 0.0504 | 0.9708 | 45.7 |
|   |   | Omicron | $3.5 \times 10^5$ | 0.0454 | 0.9548 | 50.7 |
|   |   | Delta   | $9.0 \times 10^5$ | 0.0680 | 0.9208 | 33.9 |
|   |   | Omicron | $2.9 \times 10^5$ | 0.0617 | 0.9721 | 37.3 |
|   |   | Delta   | $9.7 \times 10^5$ | 0.1033 | 0.9710 | 22.3 |
|   |   | Omicron | $2.7 \times 10^5$ | 0.0775 | 0.8988 | 29.7 |
| 5 | 1 | Delta   | $1.3 \times 10^6$ | 0.0823 | 0.8767 | 28.0 |
|   |   | Omicron | $3.9 \times 10^5$ | 0.0813 | 0.8735 | 28.3 |

|         |                   |        |        |      |
|---------|-------------------|--------|--------|------|
| Delta   | $1.1 \times 10^6$ | 0.0943 | 0.8711 | 24.4 |
| Omicron | $6.5 \times 10^5$ | 0.0970 | 0.8352 | 23.7 |
